# Supplementary material for: Structure and magnetic properties of the AB(HCO2)3 (A = Rb+ or Cs+, B = Mn2+, Co2+ or Ni2+) frameworks: probing the effect of size on the phase evolution of the ternary formates
Source: Royal Society of Chemistry journal article supplement (doi:10.1039/c5ce01628b), 2015-01-01
Supplement: c5ce01628b1.pdf [file c5ce01628b1.pdf]

**Structure and Magnetic Properties of the  
 $AB(HCO_2)_3$  ( $A = Rb^+$  or  $Cs^+$ ,  $B = Mn^{2+}$ ,  $Co^{2+}$   
or  $Ni^{2+}$ ) Frameworks:**

**Probing the Effect of Size on the Phase  
Evolution of the Ternary Formates**

Sally M. Bovill<sup>a</sup> and Paul J. Saines<sup>a,b</sup>

<sup>a</sup>Department of Chemistry, University of Oxford  
Inorganic Chemistry Laboratory, South Parks Road  
Oxford, OX1 3QR

<sup>b</sup>School of Physical Sciences, Ingram Building  
University of Kent  
Canterbury CT2 7NH

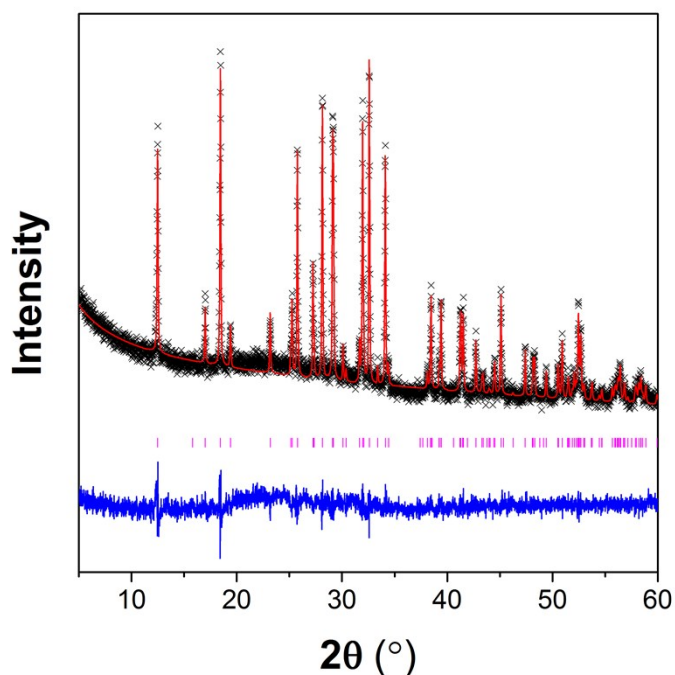

**Fig. S1:** Powder X-ray diffraction pattern of  $\text{RbMn}(\text{HCO}_2)_3$  fitted using the Le Bail method indicating the purity of the sample. The crosses, red upper line, blue lower line and vertical markers indicate the observed intensity, calculated intensity, difference plot and expected positions of Bragg reflections. The final  $R_p$ ,  $R_{wp}$  and  $\chi^2$  values are 5.25 %, 6.64 % and 1.86. The unit cell parameters were determined to be  $a = 11.2792(4) \text{ \AA}$ ,  $b = 9.1321(4) \text{ \AA}$ ,  $c = 7.0992(3) \text{ \AA}$  and  $\beta = 97.31794(2)^\circ$ .

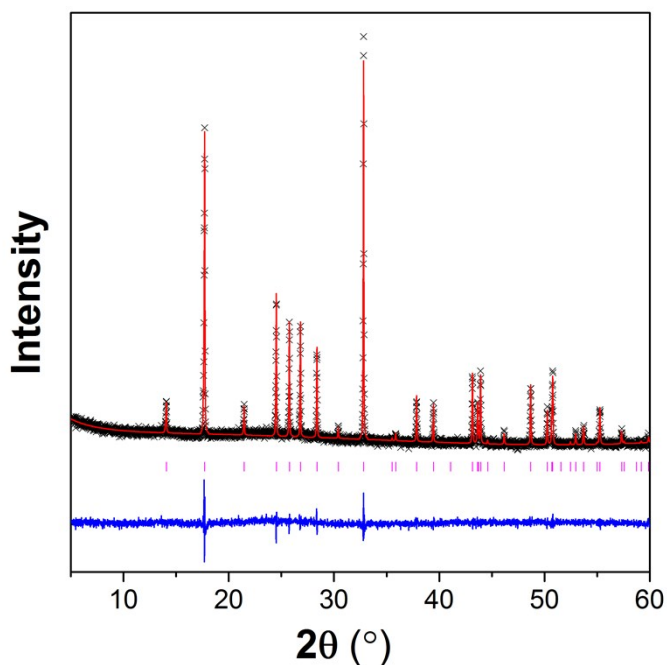

**Fig. S2:** Powder X-ray diffraction pattern of  $\text{RbCo}(\text{HCO}_2)_3$  fitted using the Le Bail method indicating the purity of the sample. The symbols are the same as in Fig. S1. The final  $R_p$ ,  $R_{wp}$  and  $\chi^2$  values are 4.81 %, 6.12 % and 1.48. The unit cell parameters were determined to be  $a = 7.25486(14) \text{ \AA}$  and  $c = 8.27212(20) \text{ \AA}$ .

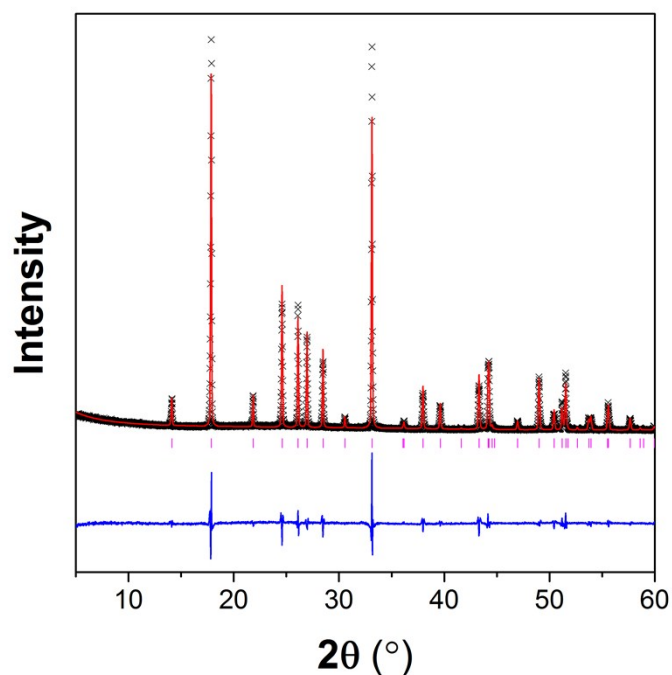

**Fig. S3:** Powder X-ray diffraction pattern of  $\text{RbNi}(\text{HCO}_2)_3$  fitted using the Le Bail method indicating the purity of the sample. The symbols are the same as in Fig. S1. The final  $R_p$ ,  $R_{wp}$  and  $\chi^2$  values are 9.70 %, 12.41% and 4.22. The unit cell parameters were determined to be  $a = 7.23158(14)$  Å and  $c = 8.12833(19)$  Å.

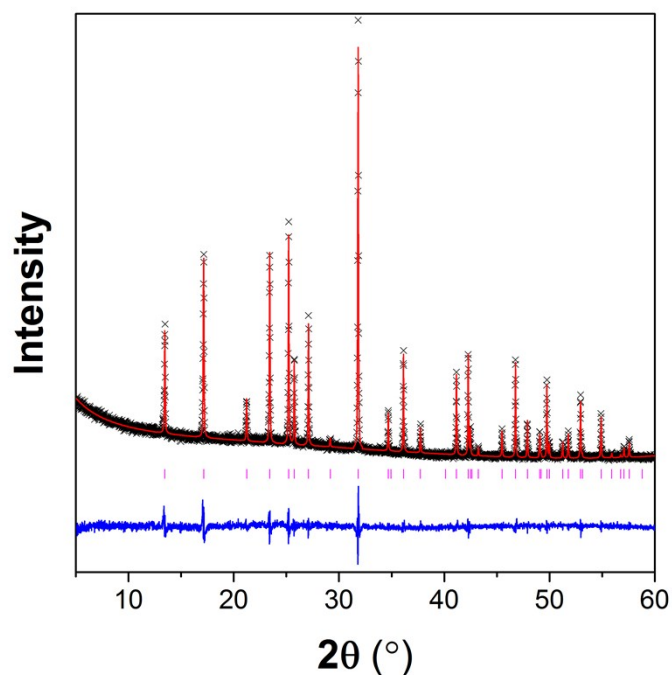

**Fig. S4:** Powder X-ray diffraction pattern of  $\text{CsMn}(\text{HCO}_2)_3$  fitted using the Le Bail method indicating the purity of the sample. The symbols are the same as in Fig. S1. The final  $R_p$ ,  $R_{wp}$  and  $\chi^2$  values are 5.87 %, 7.76 % and 1.98. The unit cell parameters were determined to be  $a = 7.58858(13)$  Å and  $c = 8.36094(18)$  Å.

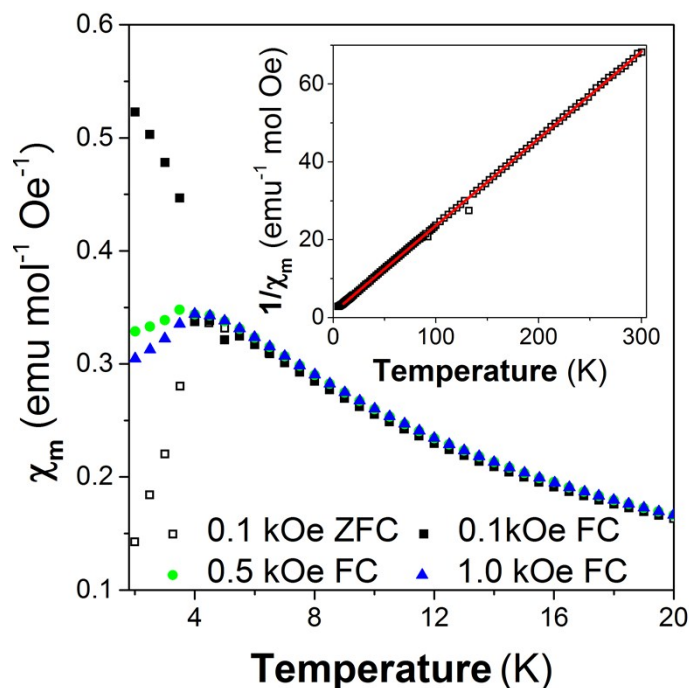

**Fig. S5:** Plot of variable temperature magnetic susceptibility measurements of  $\text{RbMn}(\text{HCO}_2)_3$  in various magnetic fields with the insert showing the Curie-Weiss fit to the inverse of the 100 Oe ZFC susceptibility measurement measured to a minimum temperature of 5 K.

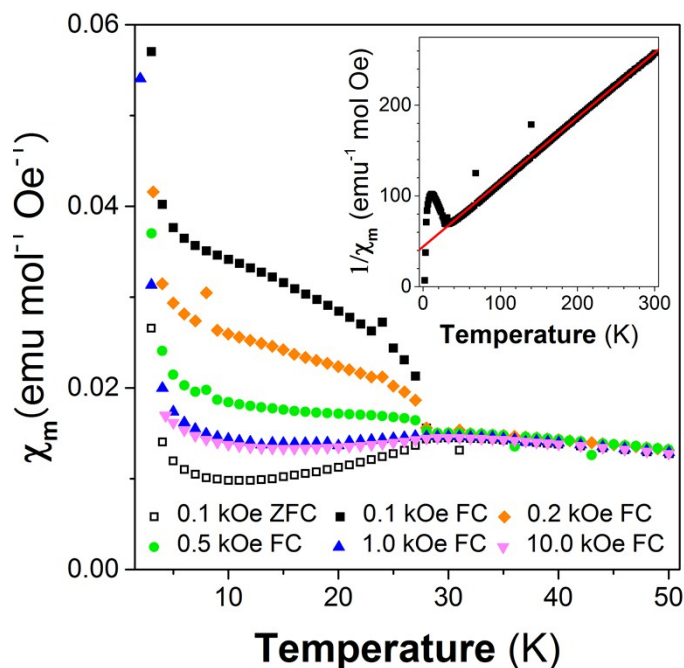

**Fig. S6:** Plot of variable temperature magnetic susceptibility measurements of  $\text{RbNi}(\text{HCO}_2)_3$  in various magnetic fields with the insert showing the Curie-Weiss fit to the inverse of the 100 Oe ZFC susceptibility measurement above 50 K.

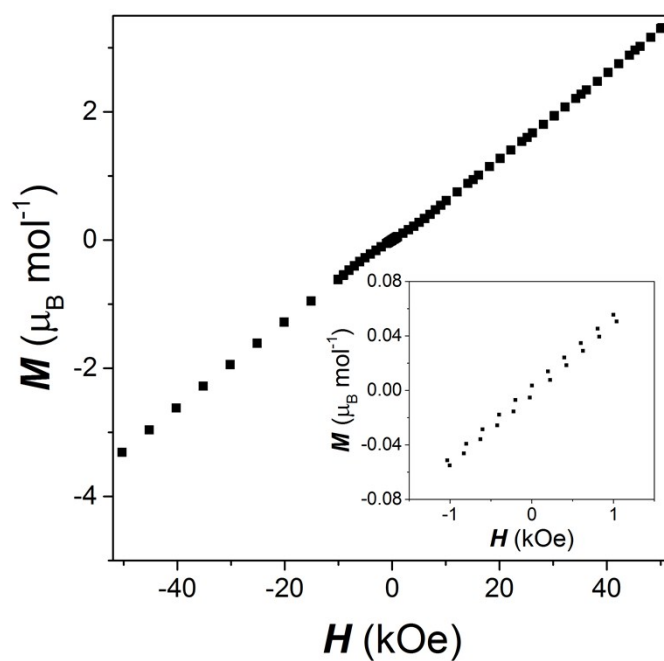

**Fig. S7:** Isothermal magnetisation measurement on  $\text{RbMn}(\text{HCO}_2)_3$  at 2 K with an insert highlighting the weak hysteresis in low applied fields.

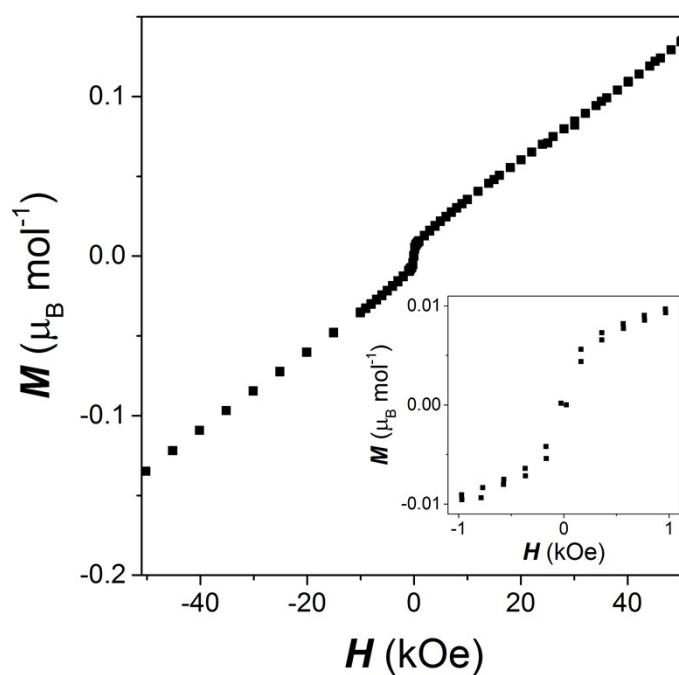

**Fig. S8:** Isothermal magnetisation measurements on  $\text{RbNi}(\text{HCO}_2)_3$  at 2 K with an insert highlighting the significant hysteresis in low applied fields.

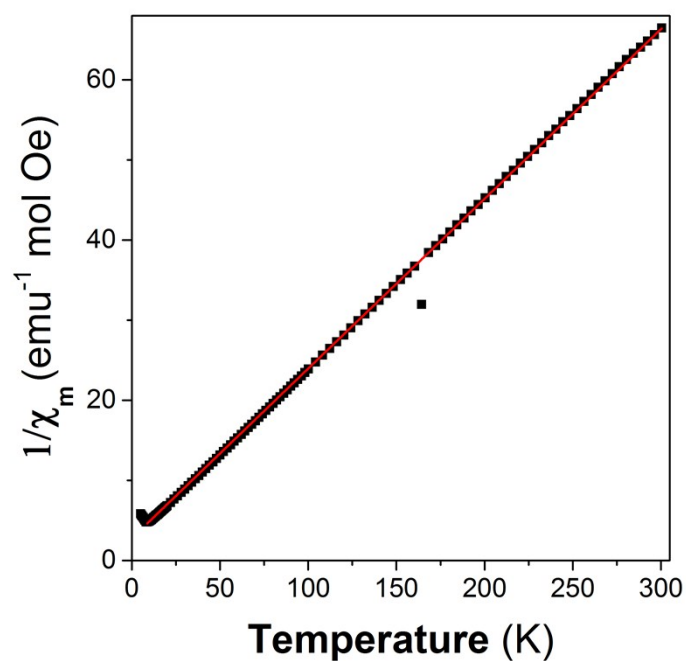

**Fig. S9:** Curie-Weiss fit to the inverse magnetic susceptibility measurement of  $\text{CsMn}(\text{HCO}_2)_3$  versus temperature above 10 K.

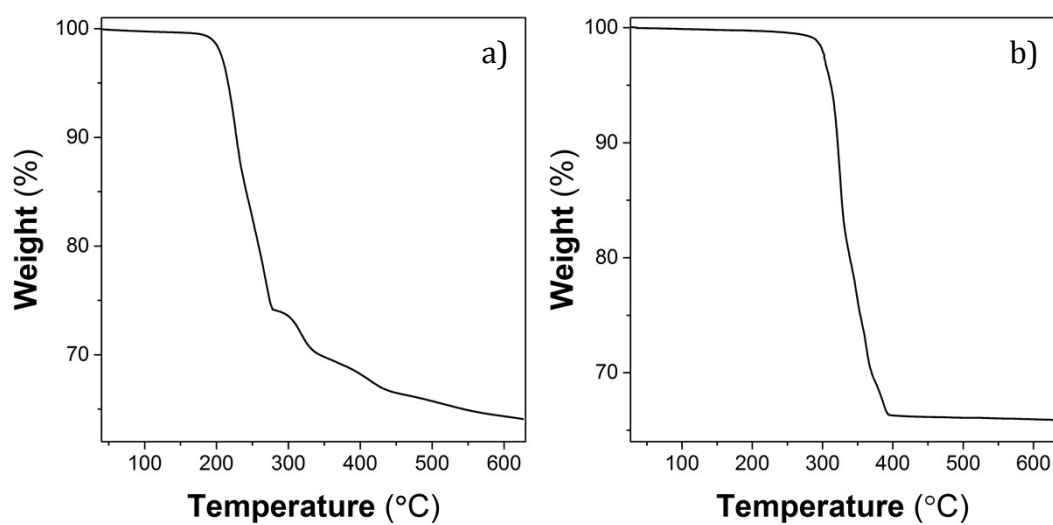

**Fig. S10:** Thermogravimetric analysis of  $\text{RbMn}(\text{HCO}_2)_3$  in a) air and b) nitrogen.

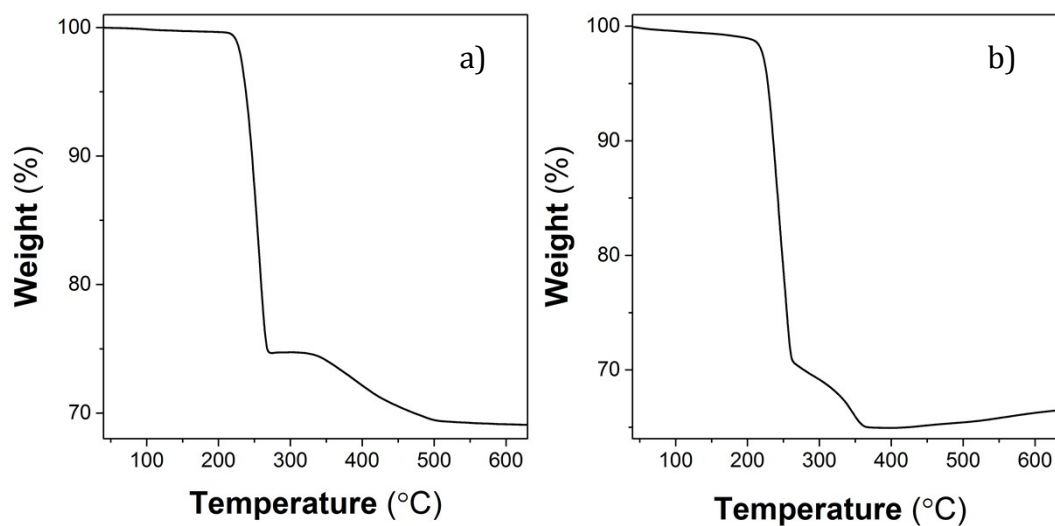

**Fig. S11:** Thermogravimetric analysis of  $\text{RbCo}(\text{HCO}_2)_3$  in a) air and b) nitrogen.

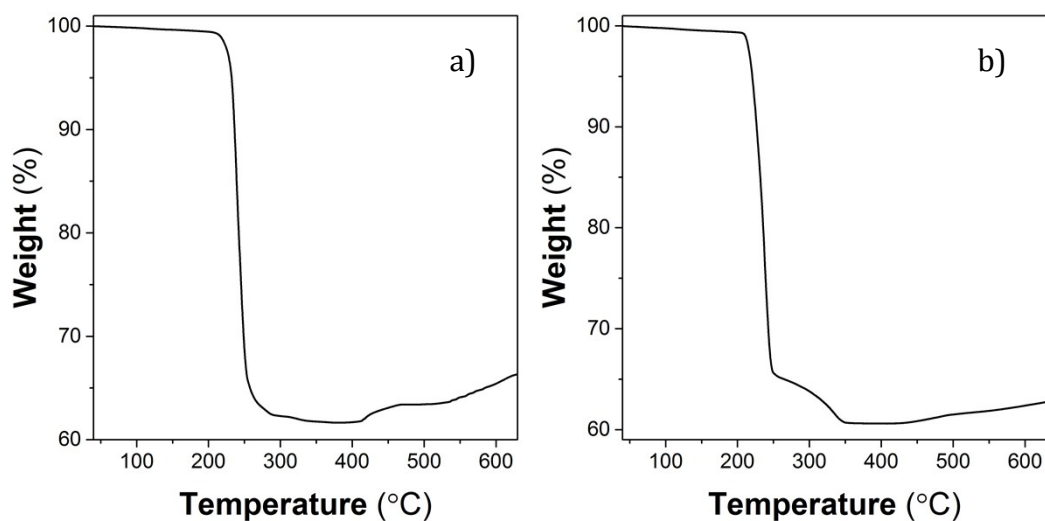

**Fig. S12:** Thermogravimetric analysis of  $\text{RbNi}(\text{HCO}_2)_3$  in a) air and b) nitrogen.

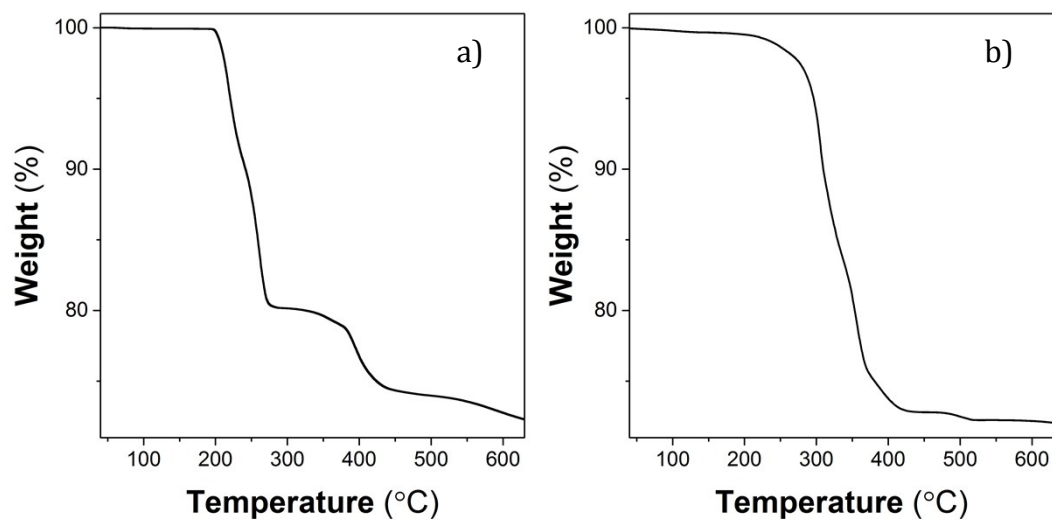

**Fig. S13:** Thermogravimetric analysis of  $\text{CsMn}(\text{HCO}_2)_3$  in a) air and b) nitrogen.
